# Supplementary material for: Anti-phytopathogenic sesquiterpenoid-xanthone adducts from potato endophytic fungus Bipolaris eleusines
Source: Royal Society of Chemistry journal article supplement (doi:10.1039/c8ra09861a), 2018-12-21

Supporting information for

## Anti-Phytopathogenic Sesquiterpenoid-Xanthone Adducts from Potato Endophytic Fungus *Bipolaris eleusines*

Juan He, Man-Si Yang, Wen-Xiang Wang, Zheng-Hui Li, Waill Ahmed Mohamed Elkhateeb,  
Ting-Chi Wen,\* Hong-Lian Ai,\* and Tao Feng\*

### Contents

#### Supplementary Figures

- Figure S1. <sup>1</sup>H NMR spectrum in CDCl<sub>3</sub> for bipolenin I (1)
- Figure S2. <sup>13</sup>C NMR and DEPT spectrum in CDCl<sub>3</sub> for bipolenin I (1)
- Figure S3. <sup>1</sup>H-<sup>1</sup>H COSY spectrum in CDCl<sub>3</sub> for bipolenin I (1)
- Figure S4. HSQC spectrum in CDCl<sub>3</sub> for bipolenin I (1)
- Figure S5. HMBC spectrum in CDCl<sub>3</sub> for bipolenin I (1)
- Figure S6. ROESY spectrum in CDCl<sub>3</sub> for bipolenin I (1)
- Figure S7. HRESIMS for bipolenin I (1)
- Figure S8. <sup>1</sup>H NMR spectrum in CDCl<sub>3</sub> for bipolenin I (1)
- Figure S9. <sup>13</sup>C NMR and DEPT spectrum in CDCl<sub>3</sub> for bipolenin J (2)
- Figure S10. <sup>1</sup>H-<sup>1</sup>H COSY spectrum in CDCl<sub>3</sub> for bipolenin J (2)
- Figure S11. HSQC spectrum in CDCl<sub>3</sub> for bipolenin J (2)
- Figure S12. HMBC spectrum in CDCl<sub>3</sub> for bipolenin J (2)
- Figure S13. ROESY spectrum in CDCl<sub>3</sub> for bipolenin J (2)
- Figure S14. HRESIMS for bipolenin J (2)

# 1. Supplementary Figures

Figure S1. <sup>1</sup>H NMR spectrum in CDCl<sub>3</sub> for bipolenin I (1)

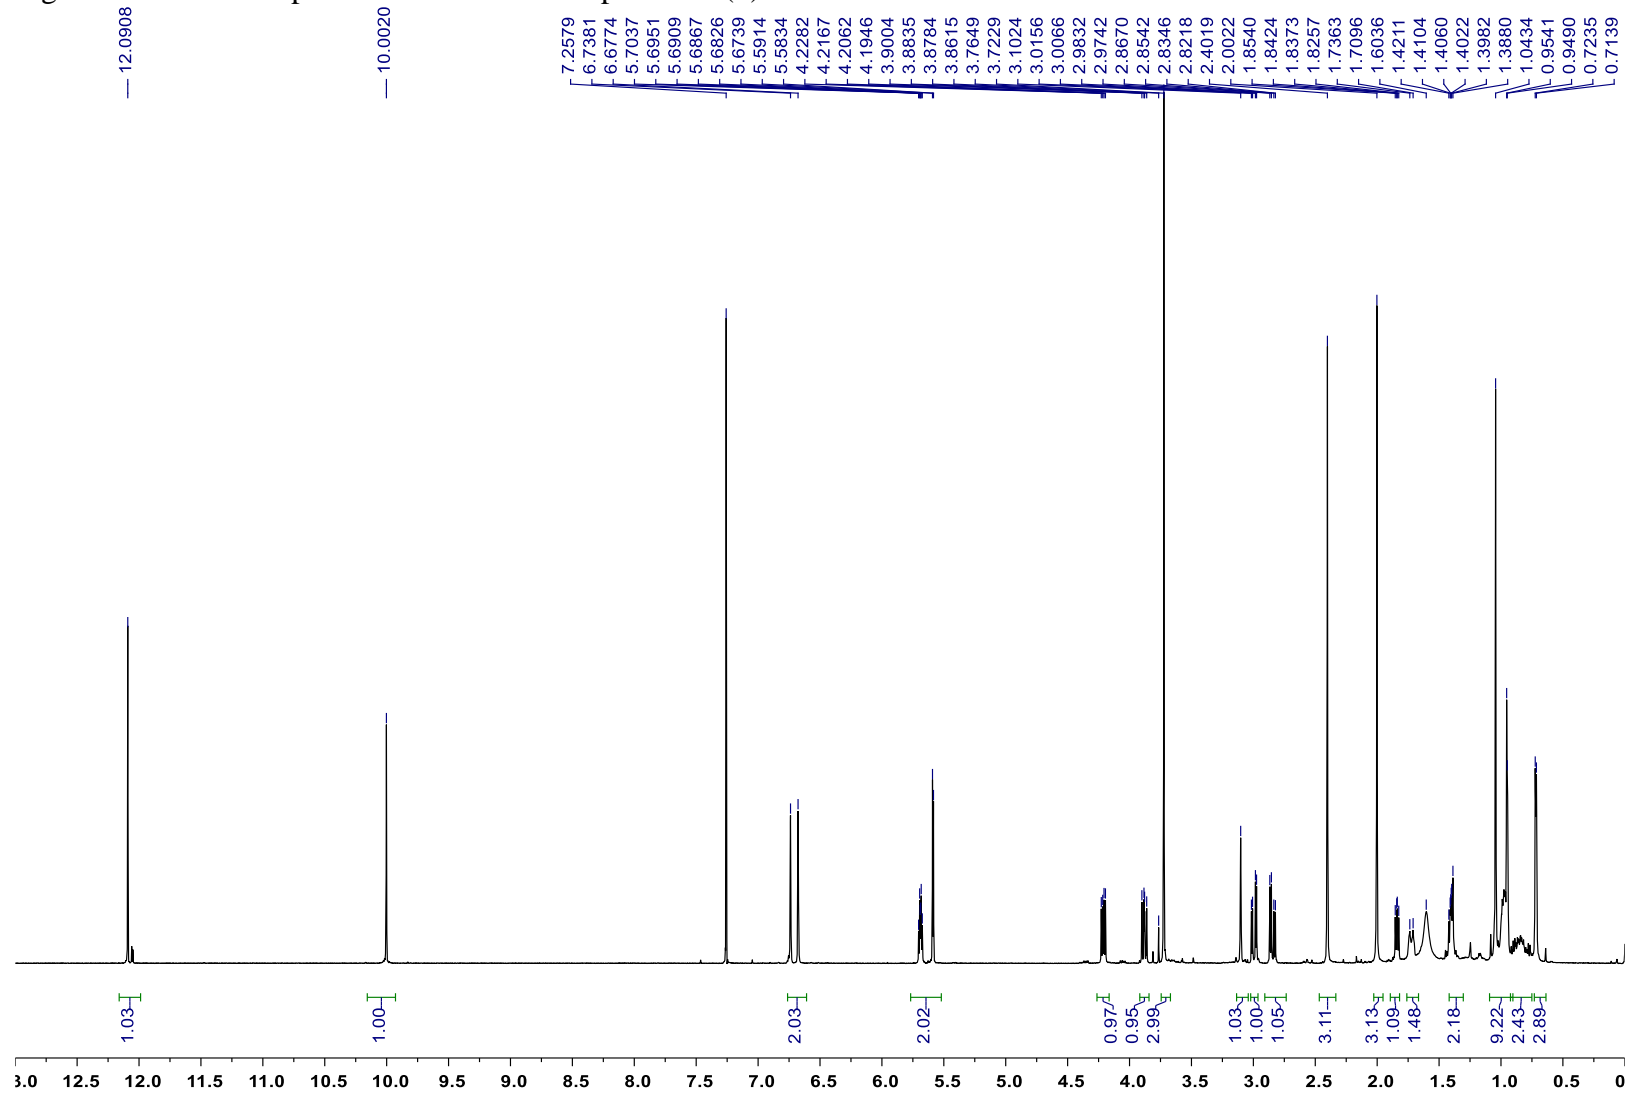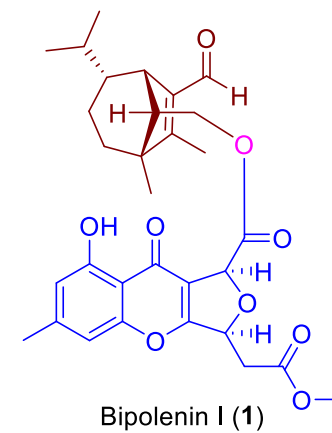

Figure S2.  $^{13}\text{C}$  NMR and DEPT spectrum in  $\text{CDCl}_3$  for bipolenin I (**1**)

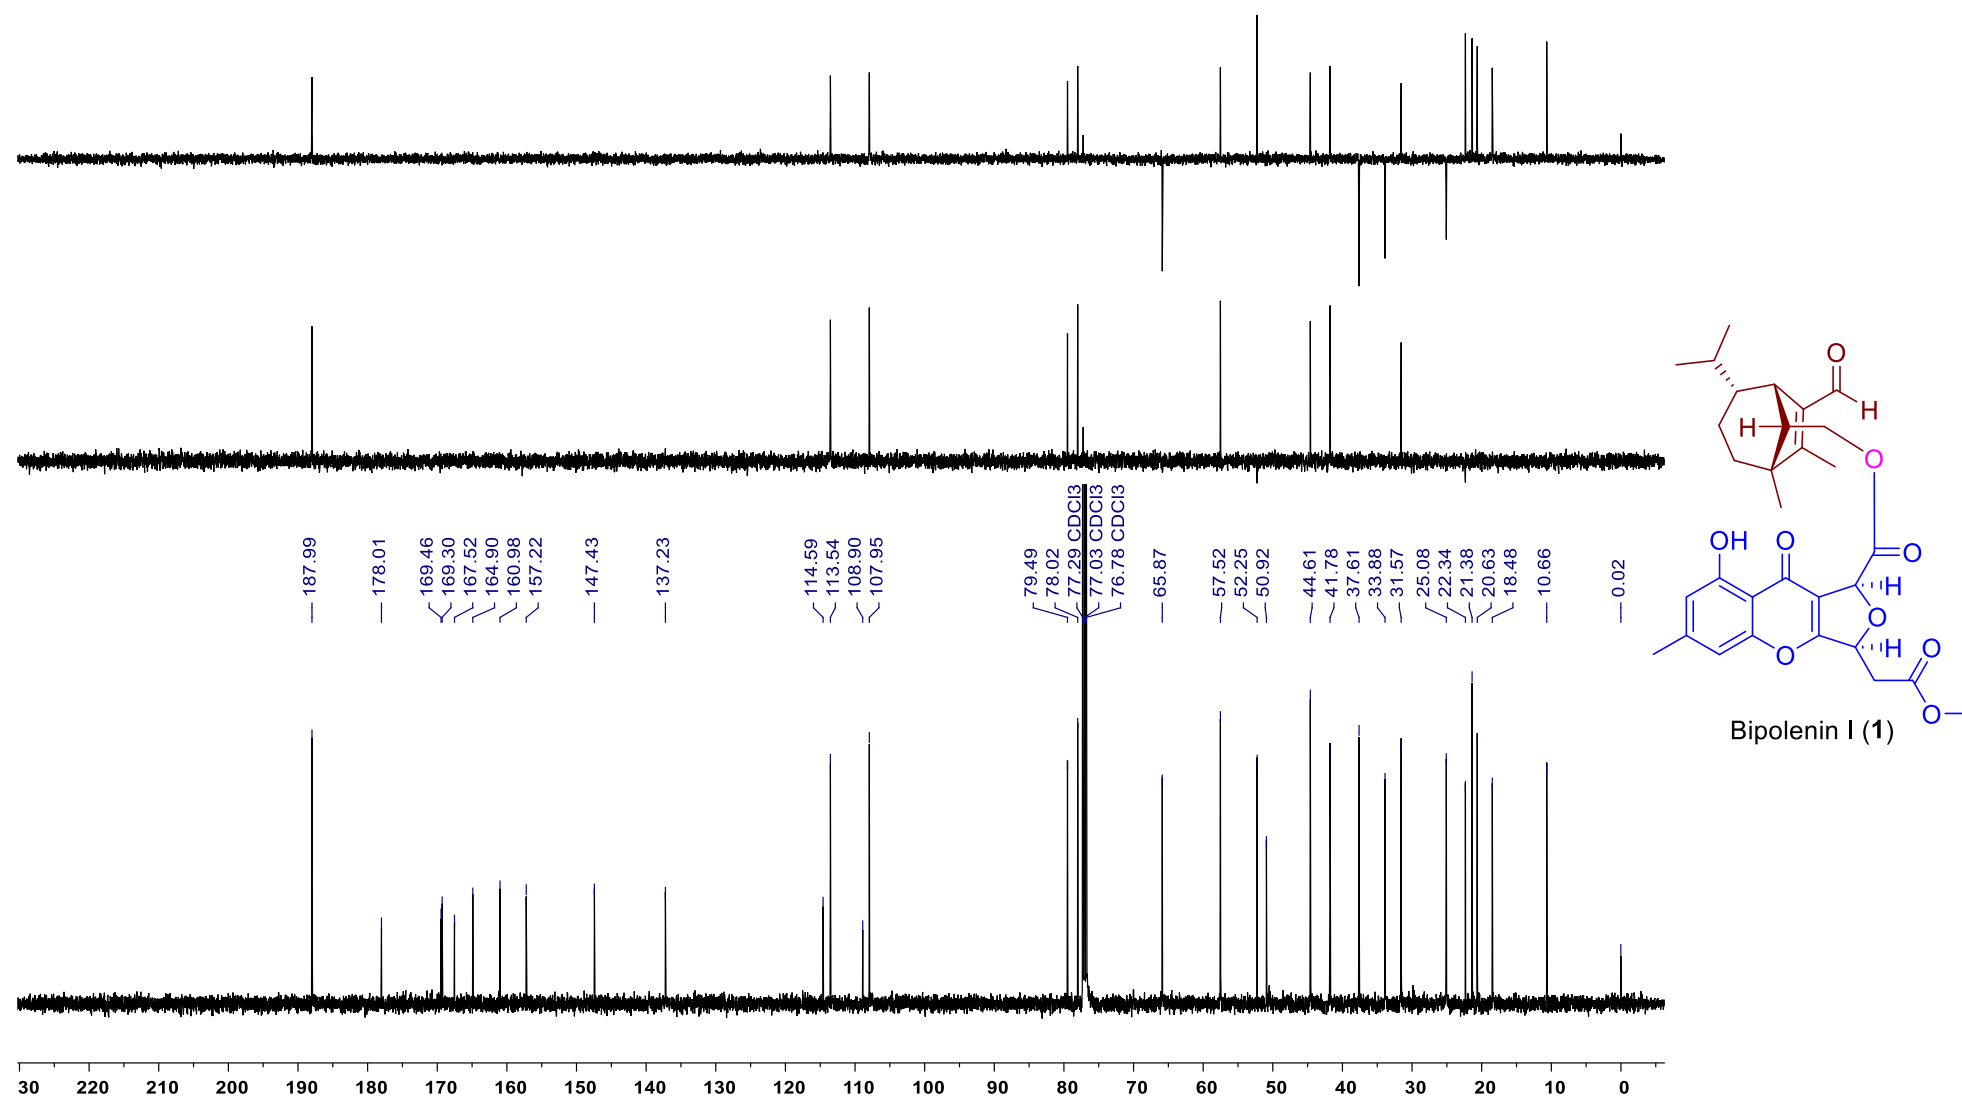

Figure S3.  $^1\text{H}$ - $^1\text{H}$  COSY spectrum in  $\text{CDCl}_3$  for bipolenin I (**1**)

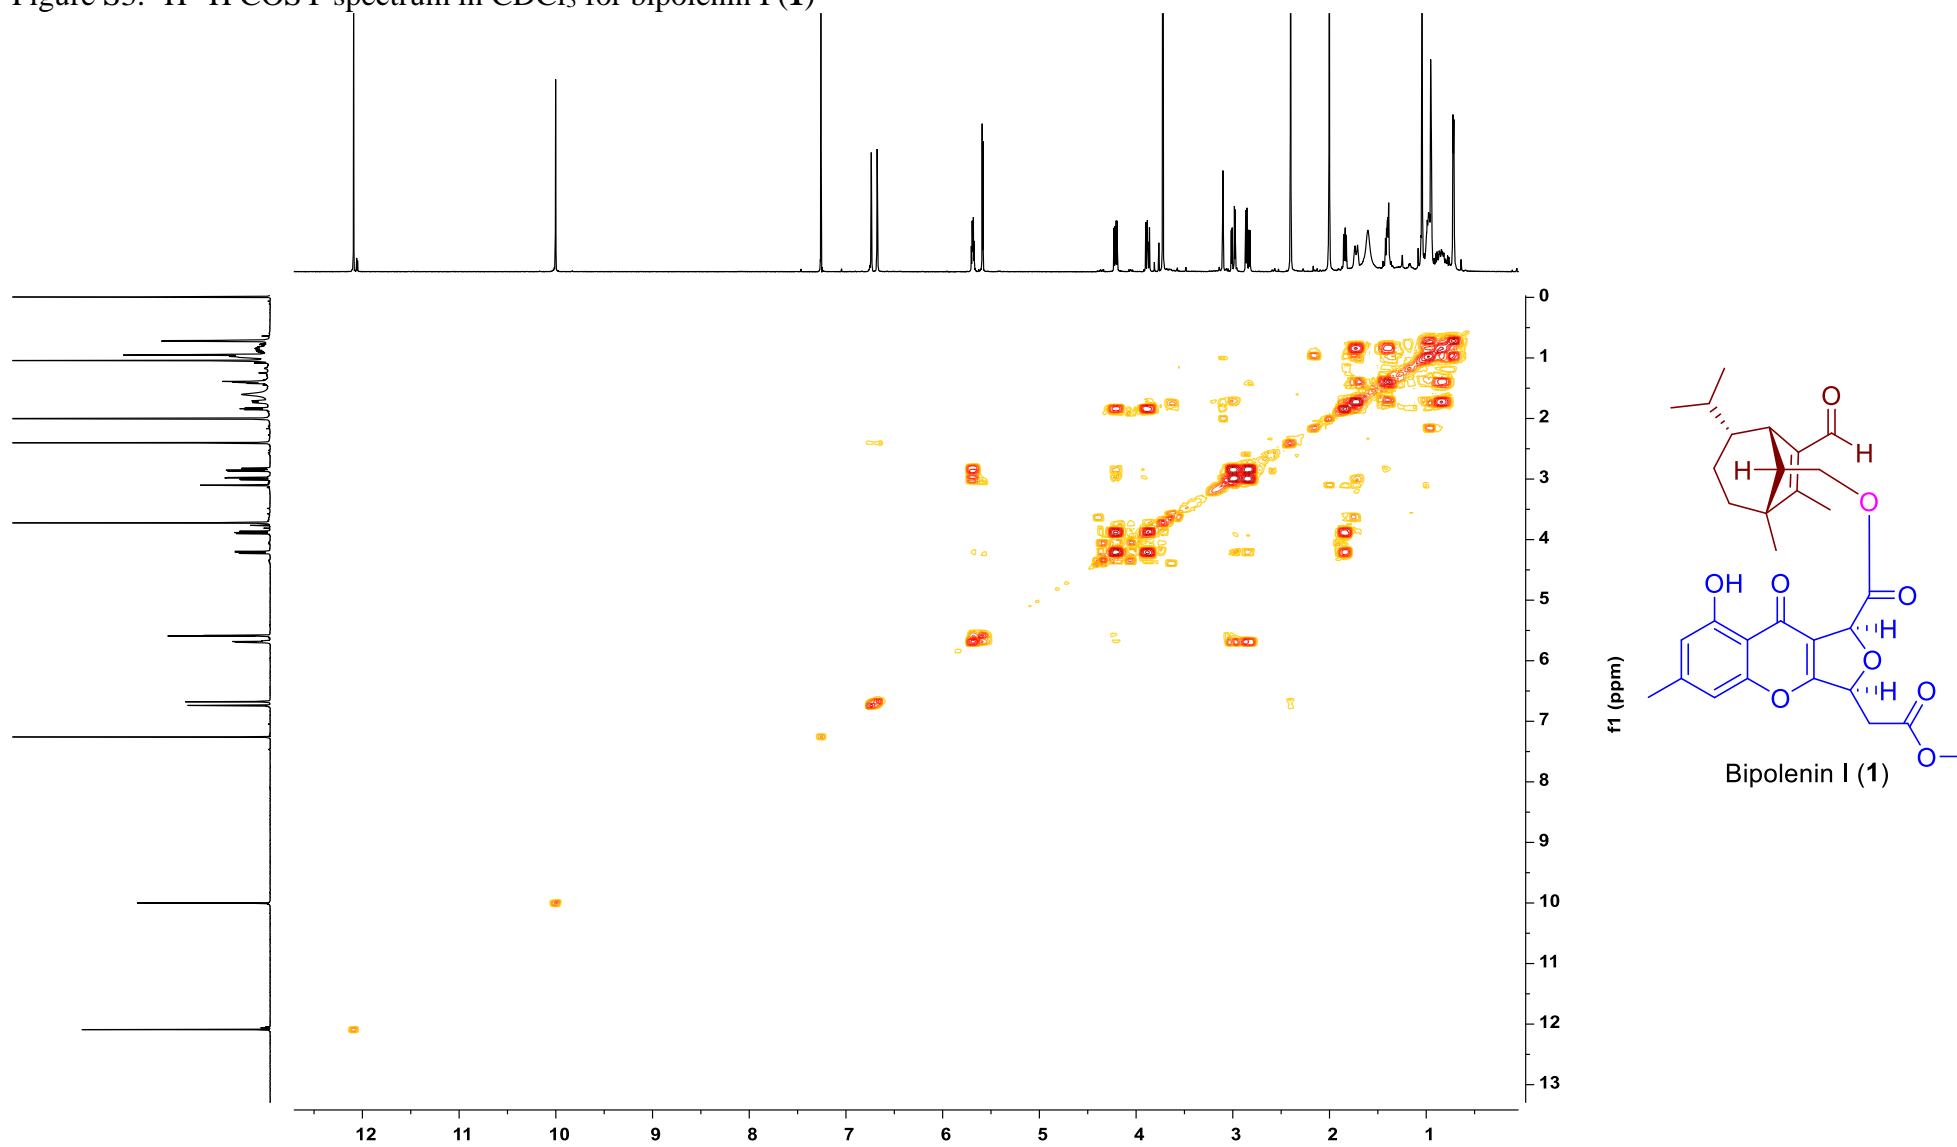

Figure S4. HSQC spectrum in CDCl<sub>3</sub> for bipolenin I (**1**)

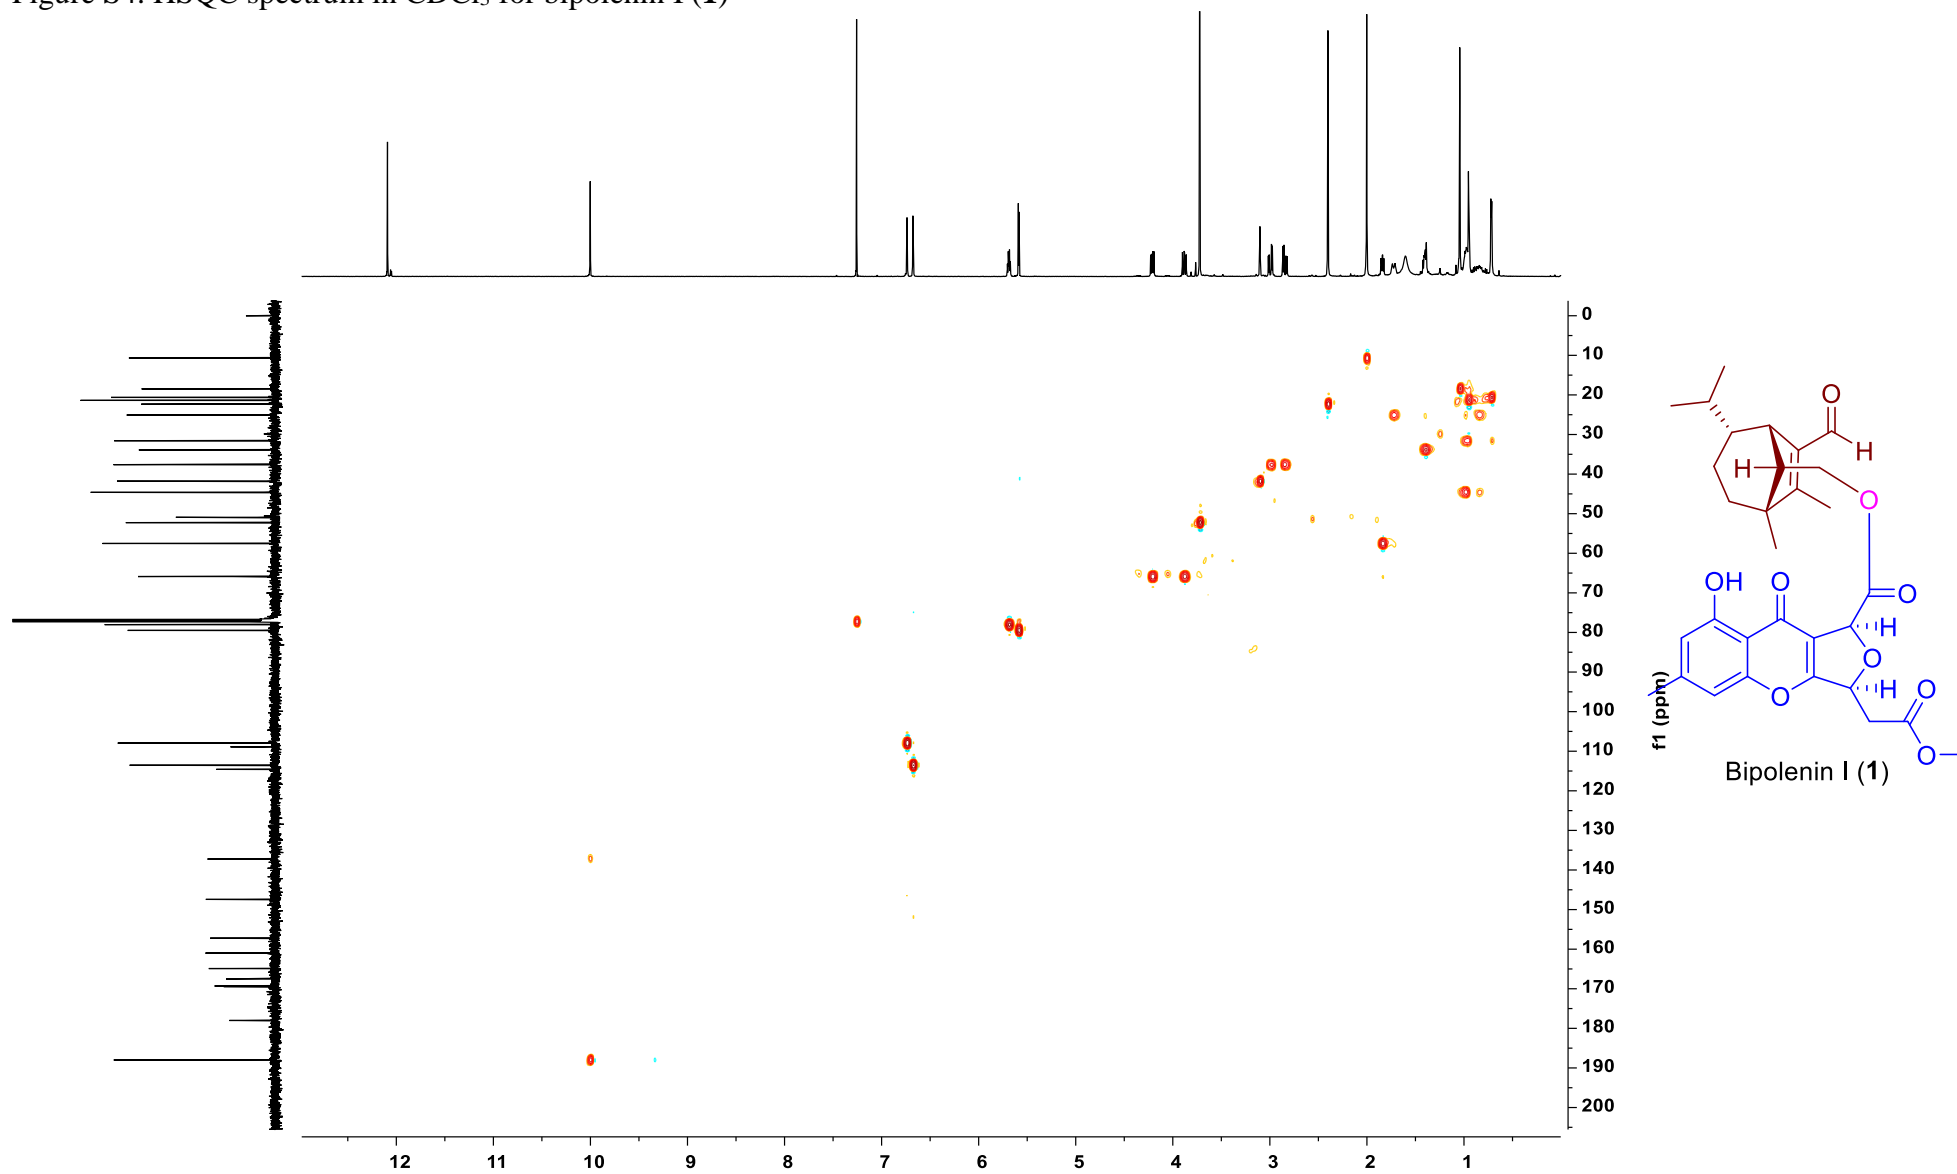

Figure S5. HMBC spectrum in CDCl<sub>3</sub> for bipolenin I (**1**)

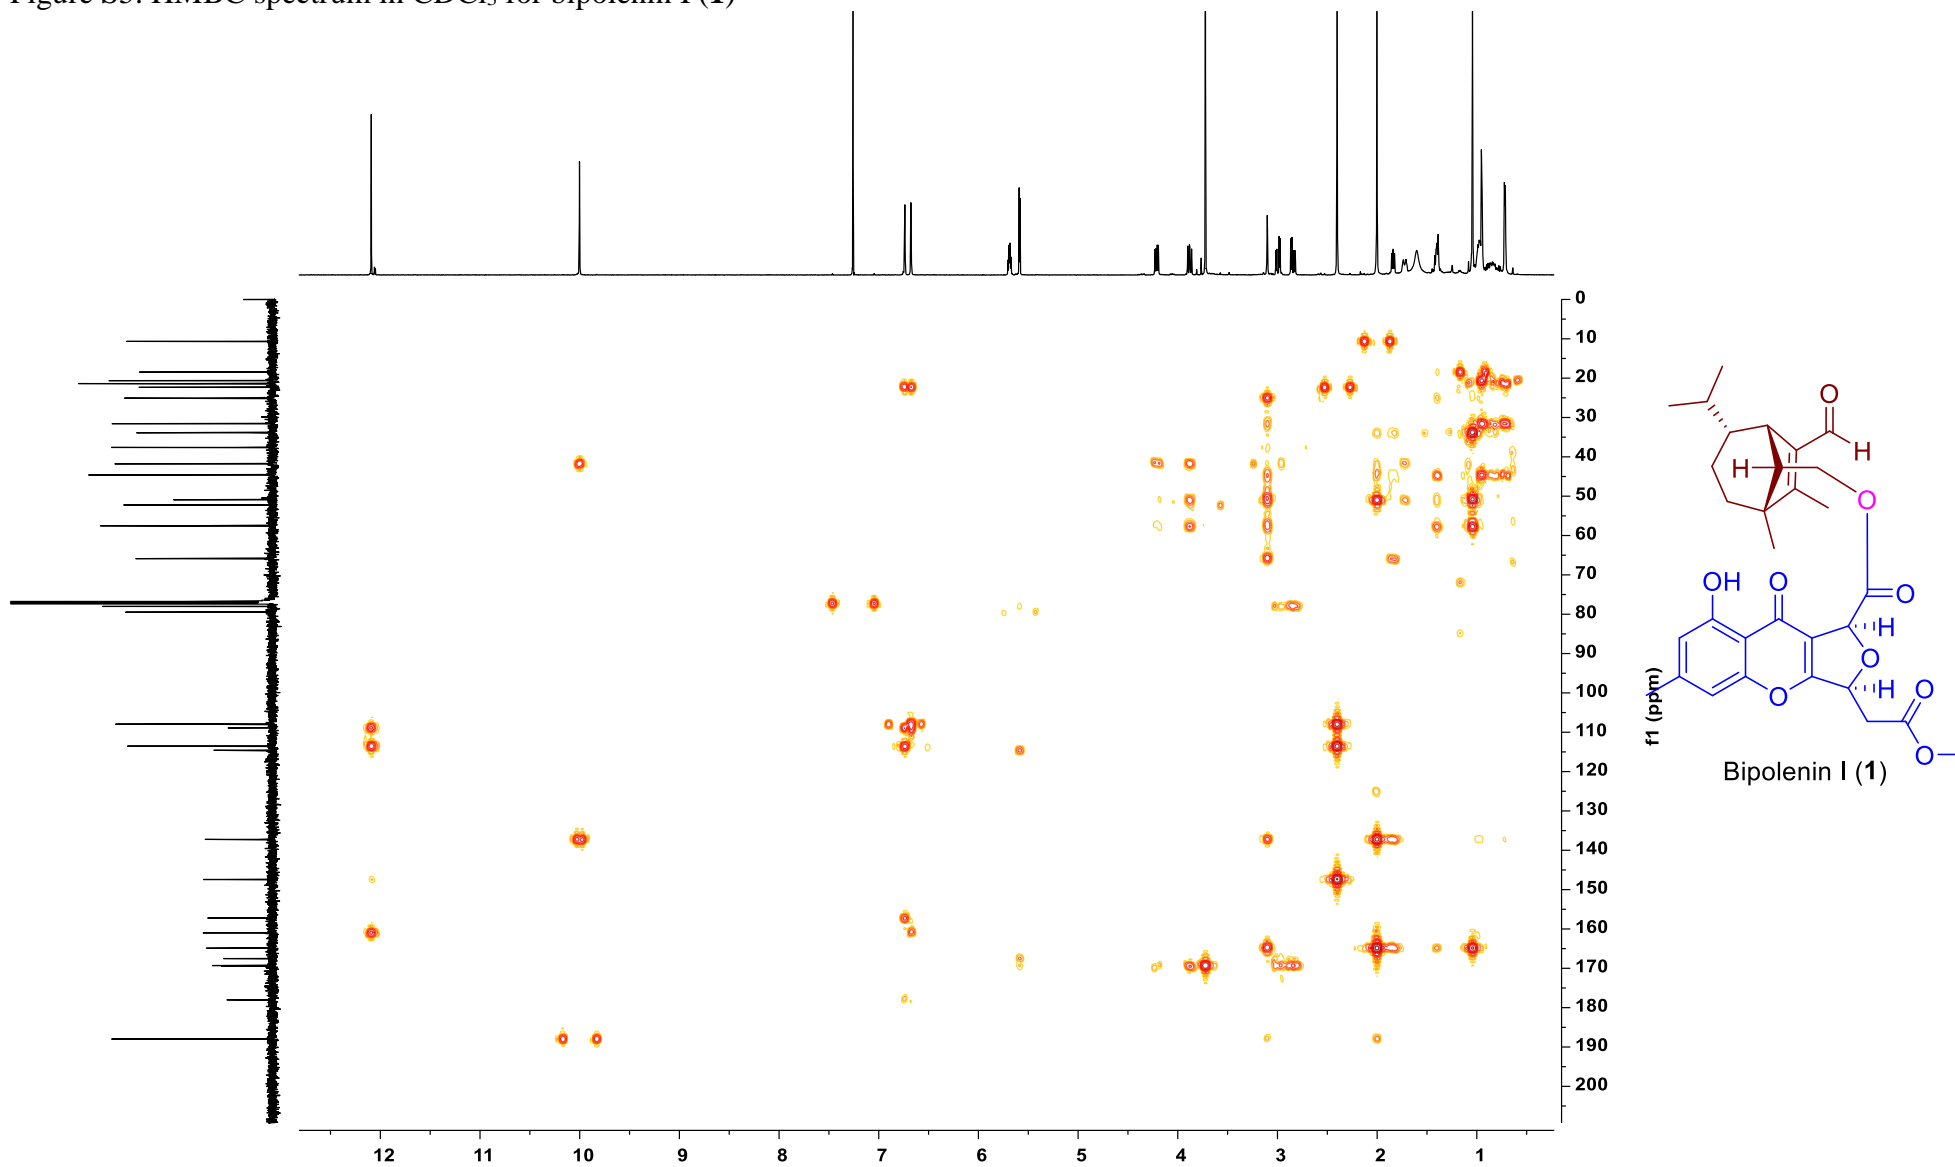

Figure S6. ROESY spectrum in CDCl<sub>3</sub> for bipolenin I (**1**)

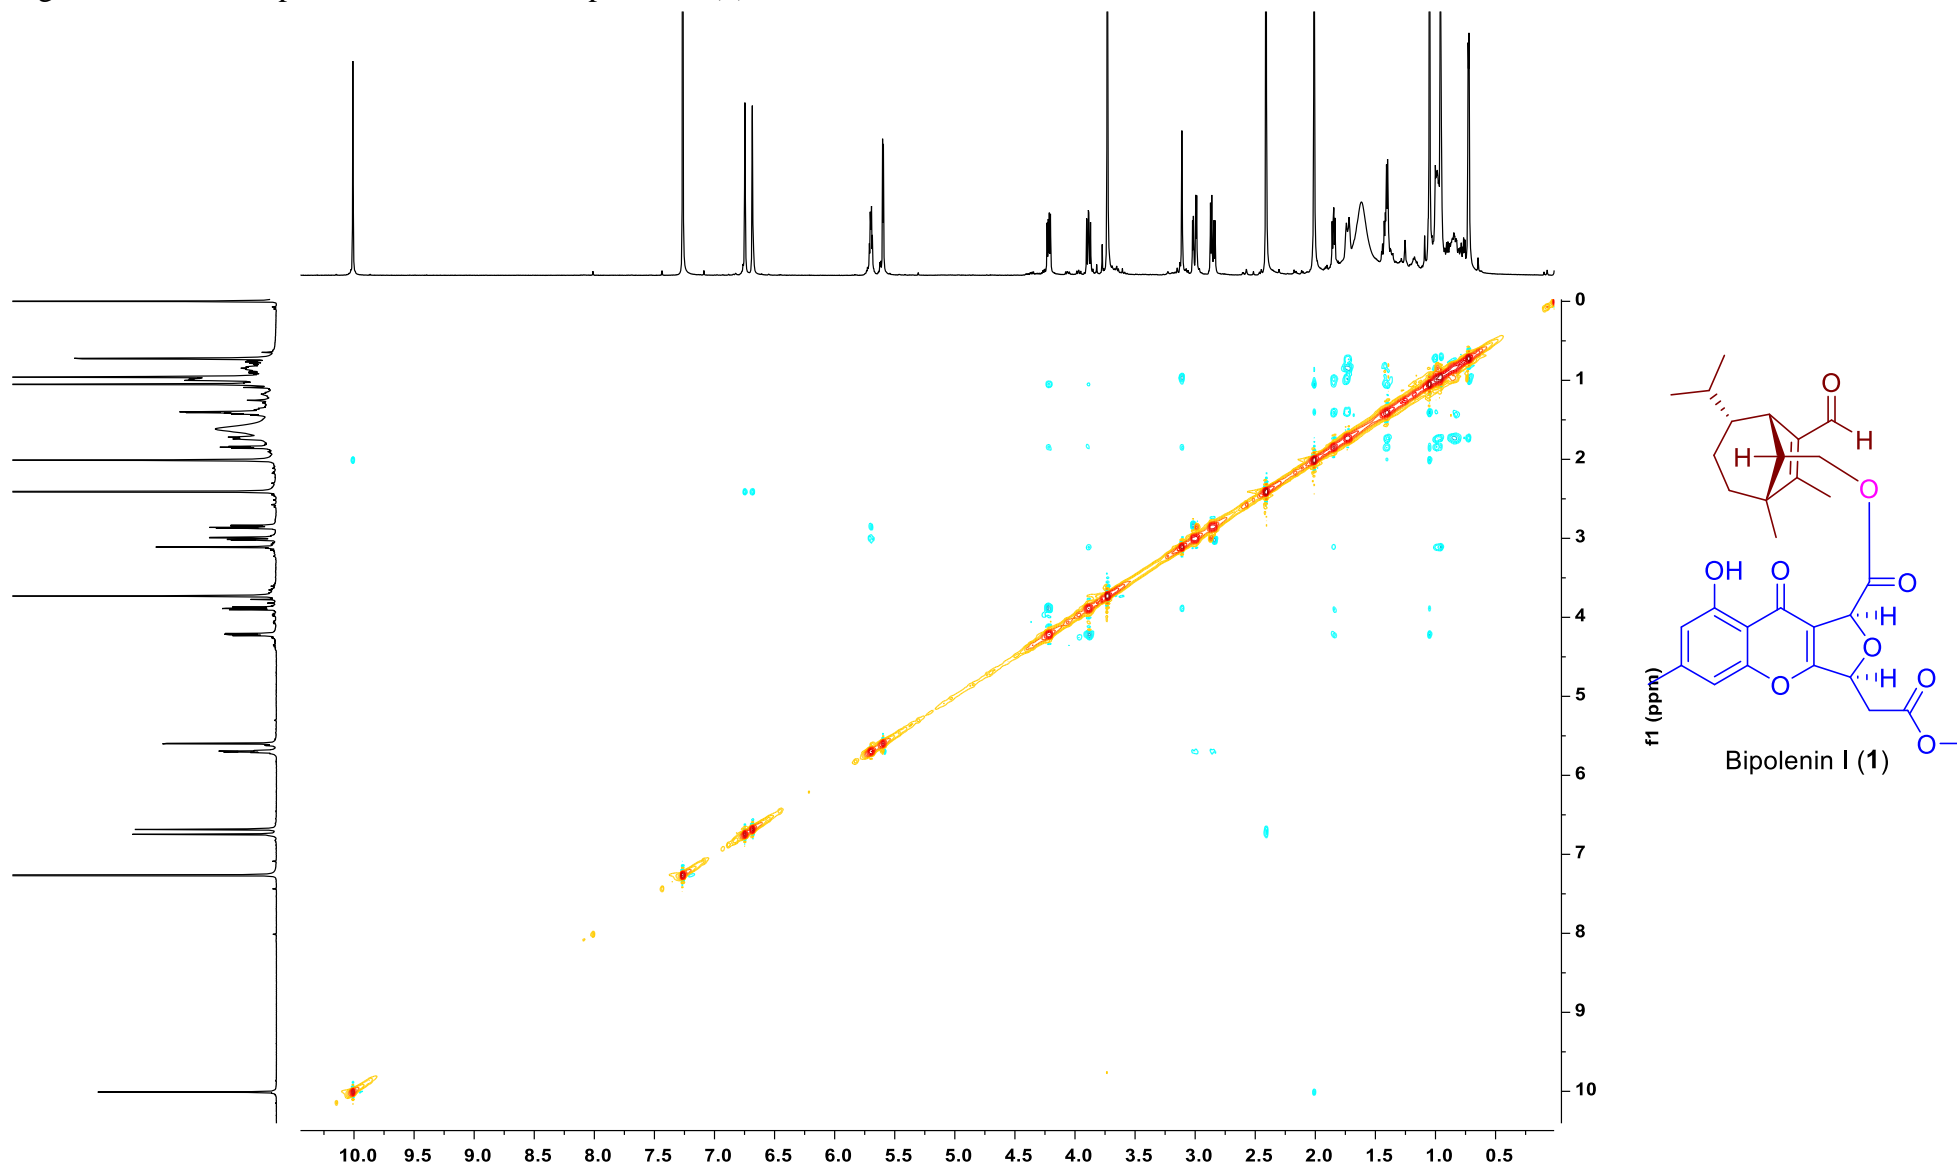

Figure S7. HRESIMS for bipolenin I (1)

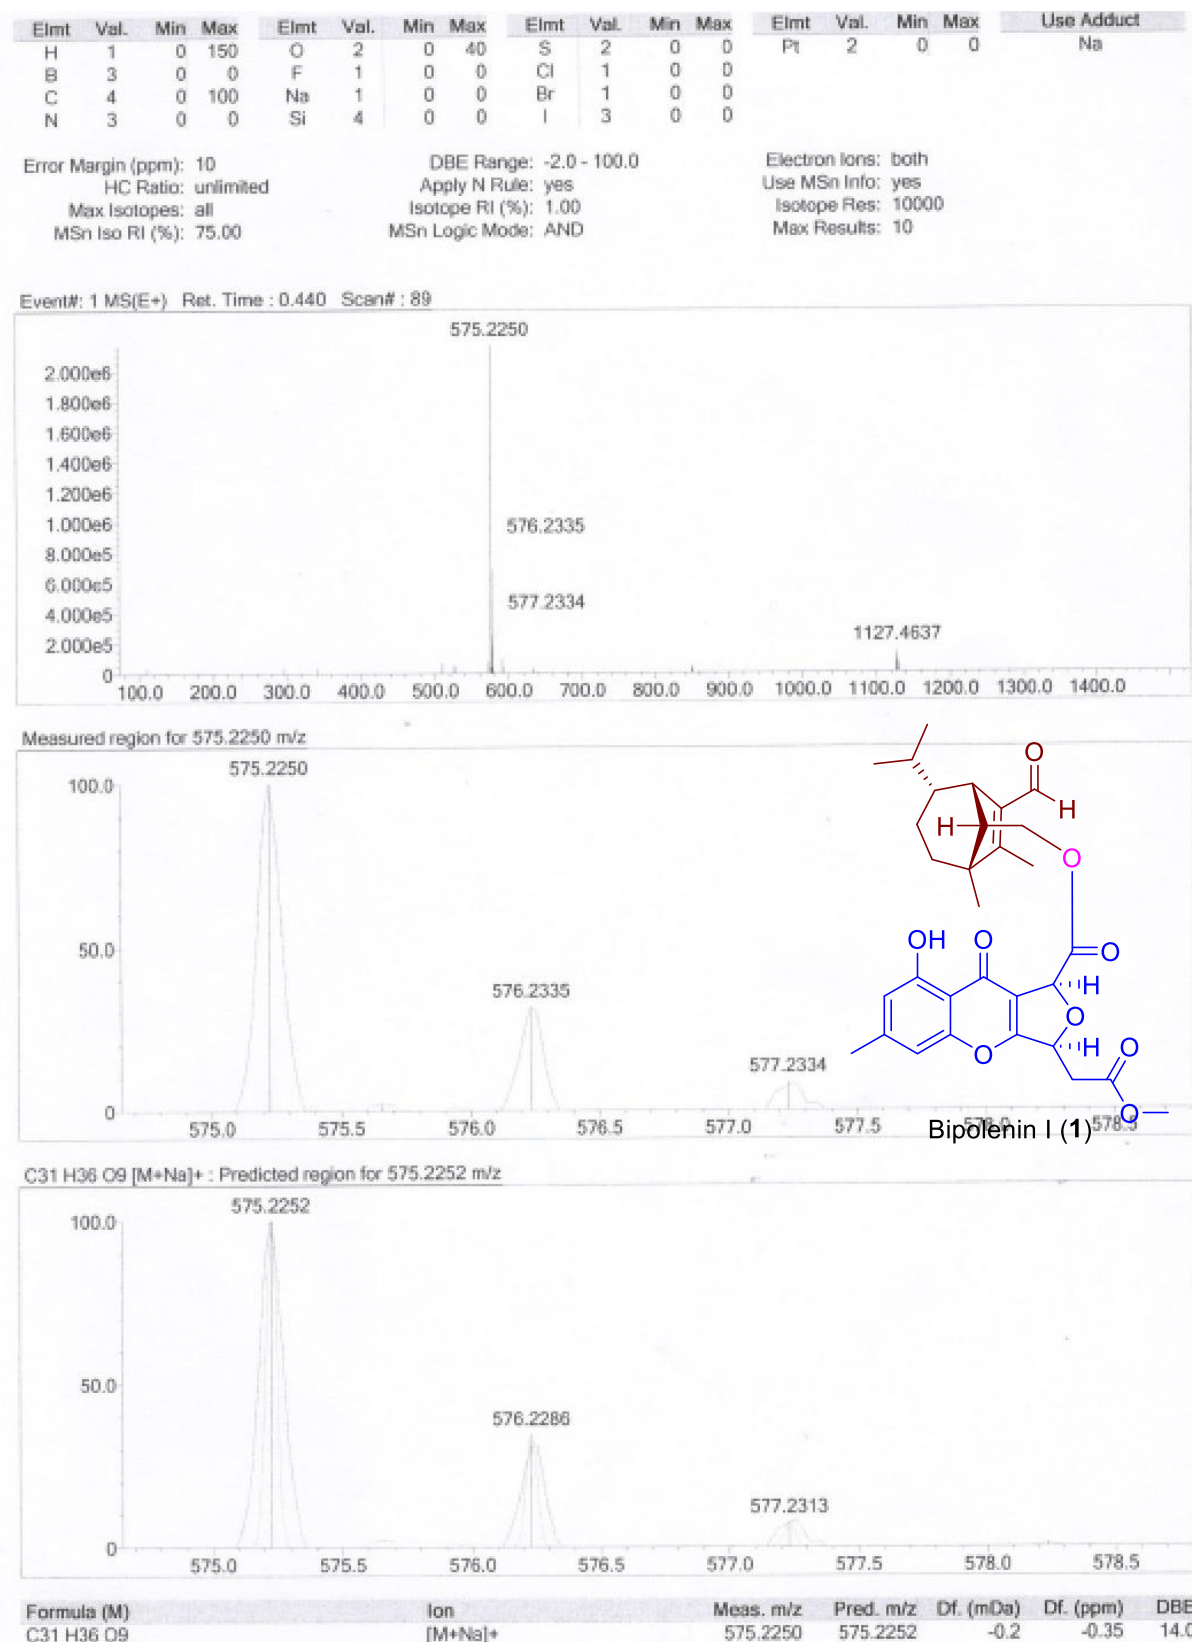



Figure S8.  $^1\text{H}$  NMR spectrum in  $\text{CDCl}_3$  for bipolenin J (**2**)

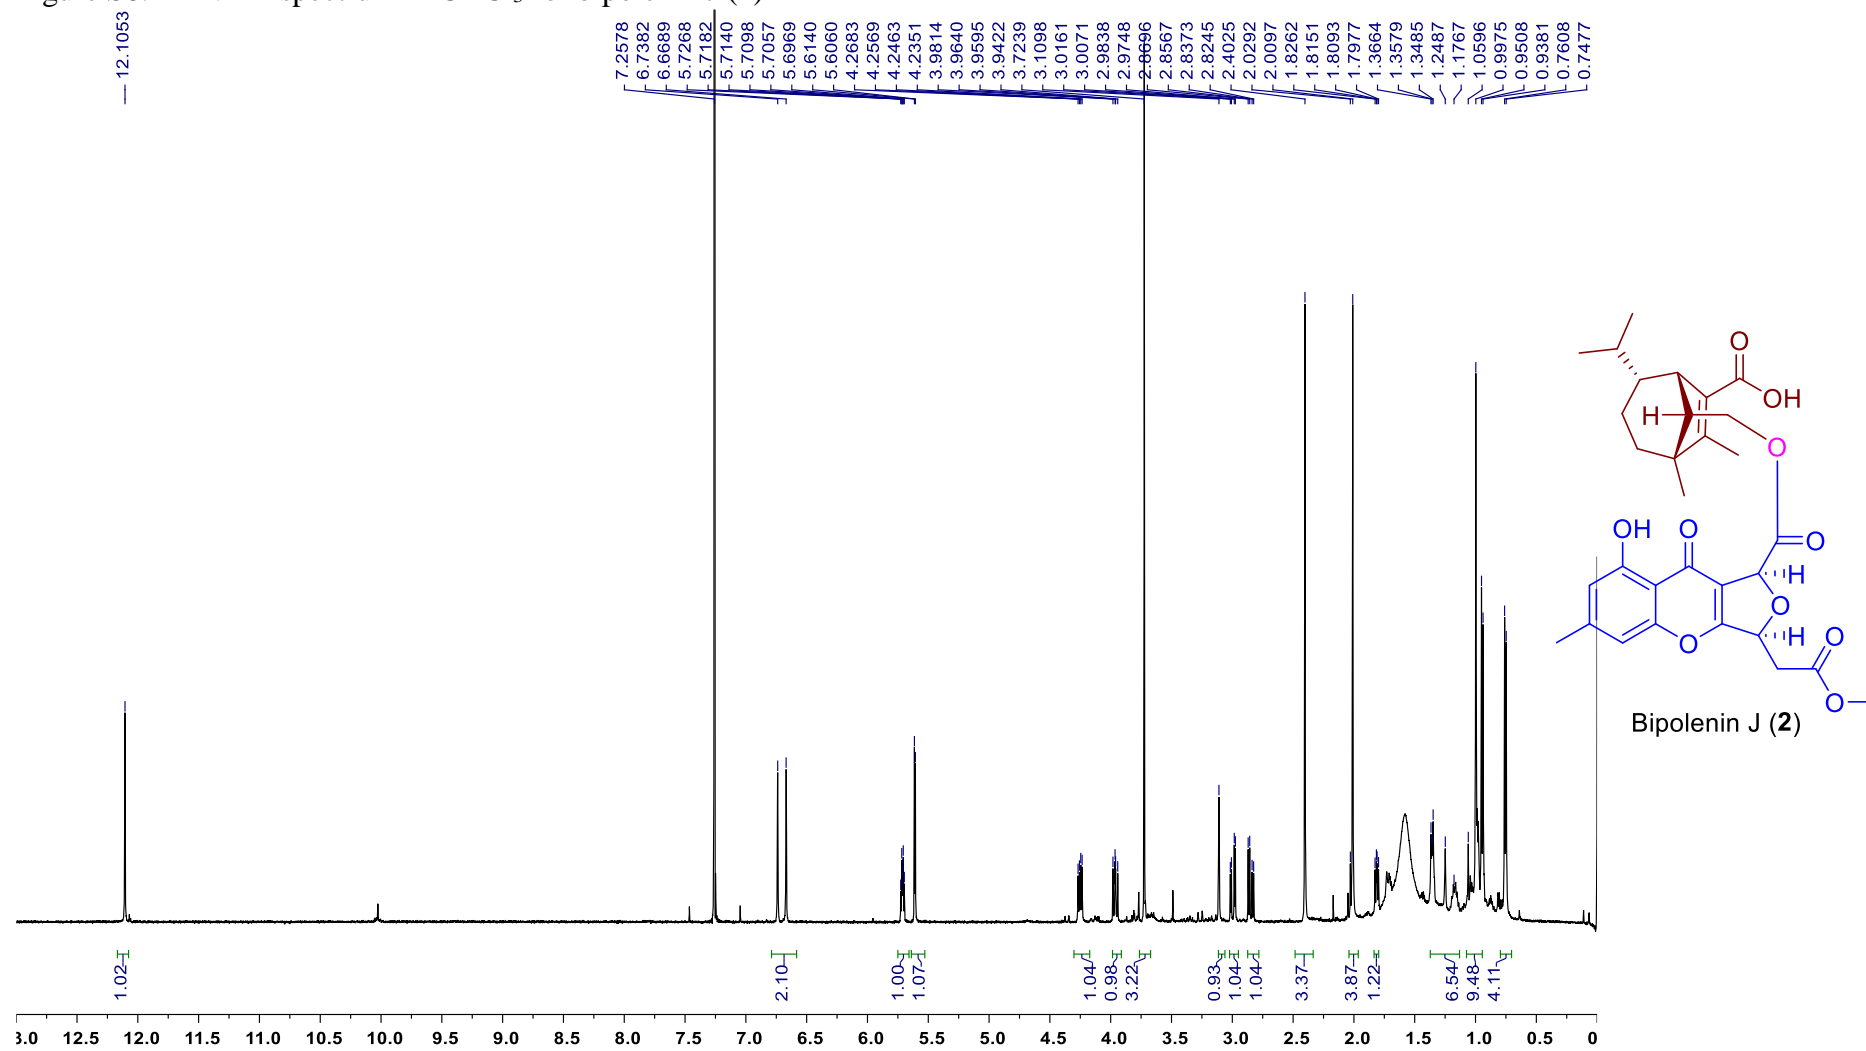

Figure S9.  $^{13}\text{C}$  NMR spectrum in  $\text{CDCl}_3$  for bipolenin J (2)

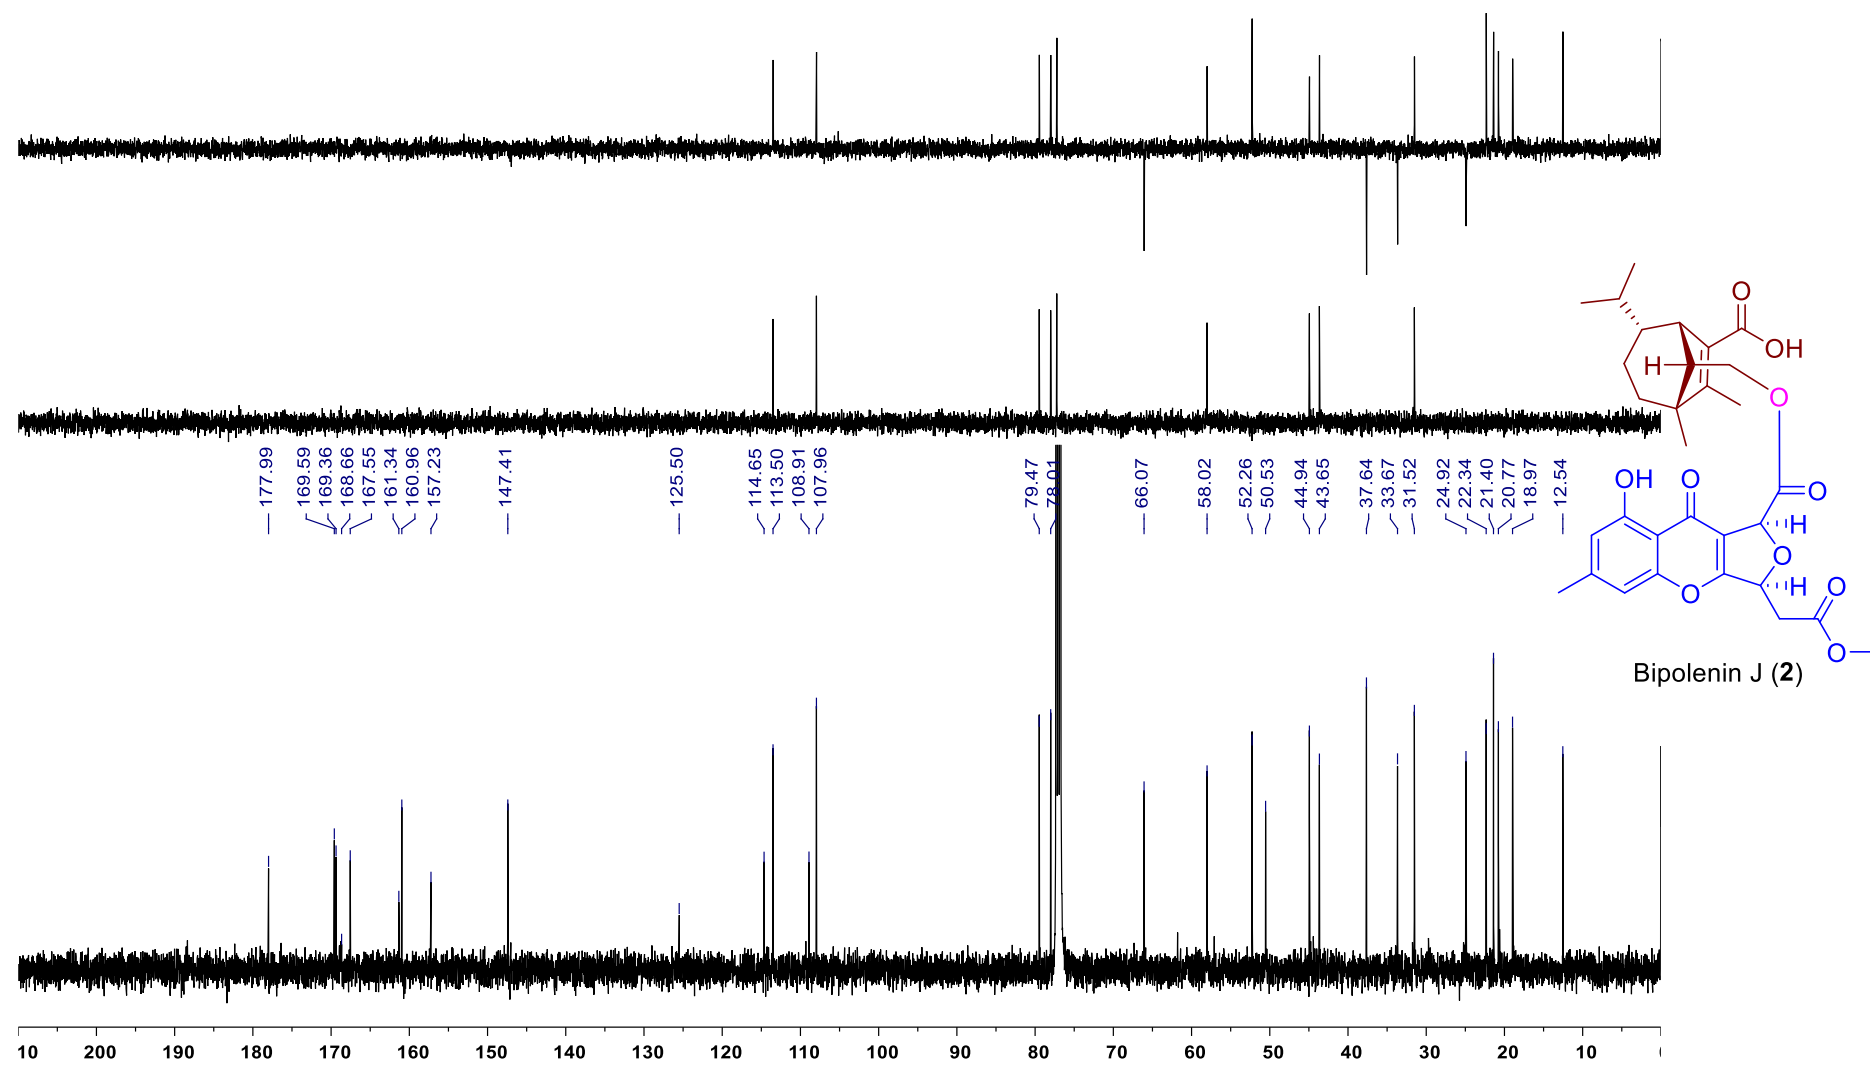

Figure S10.  $^1\text{H}$ - $^1\text{H}$  COSY spectrum in  $\text{CDCl}_3$  for bipolenin J (**2**)

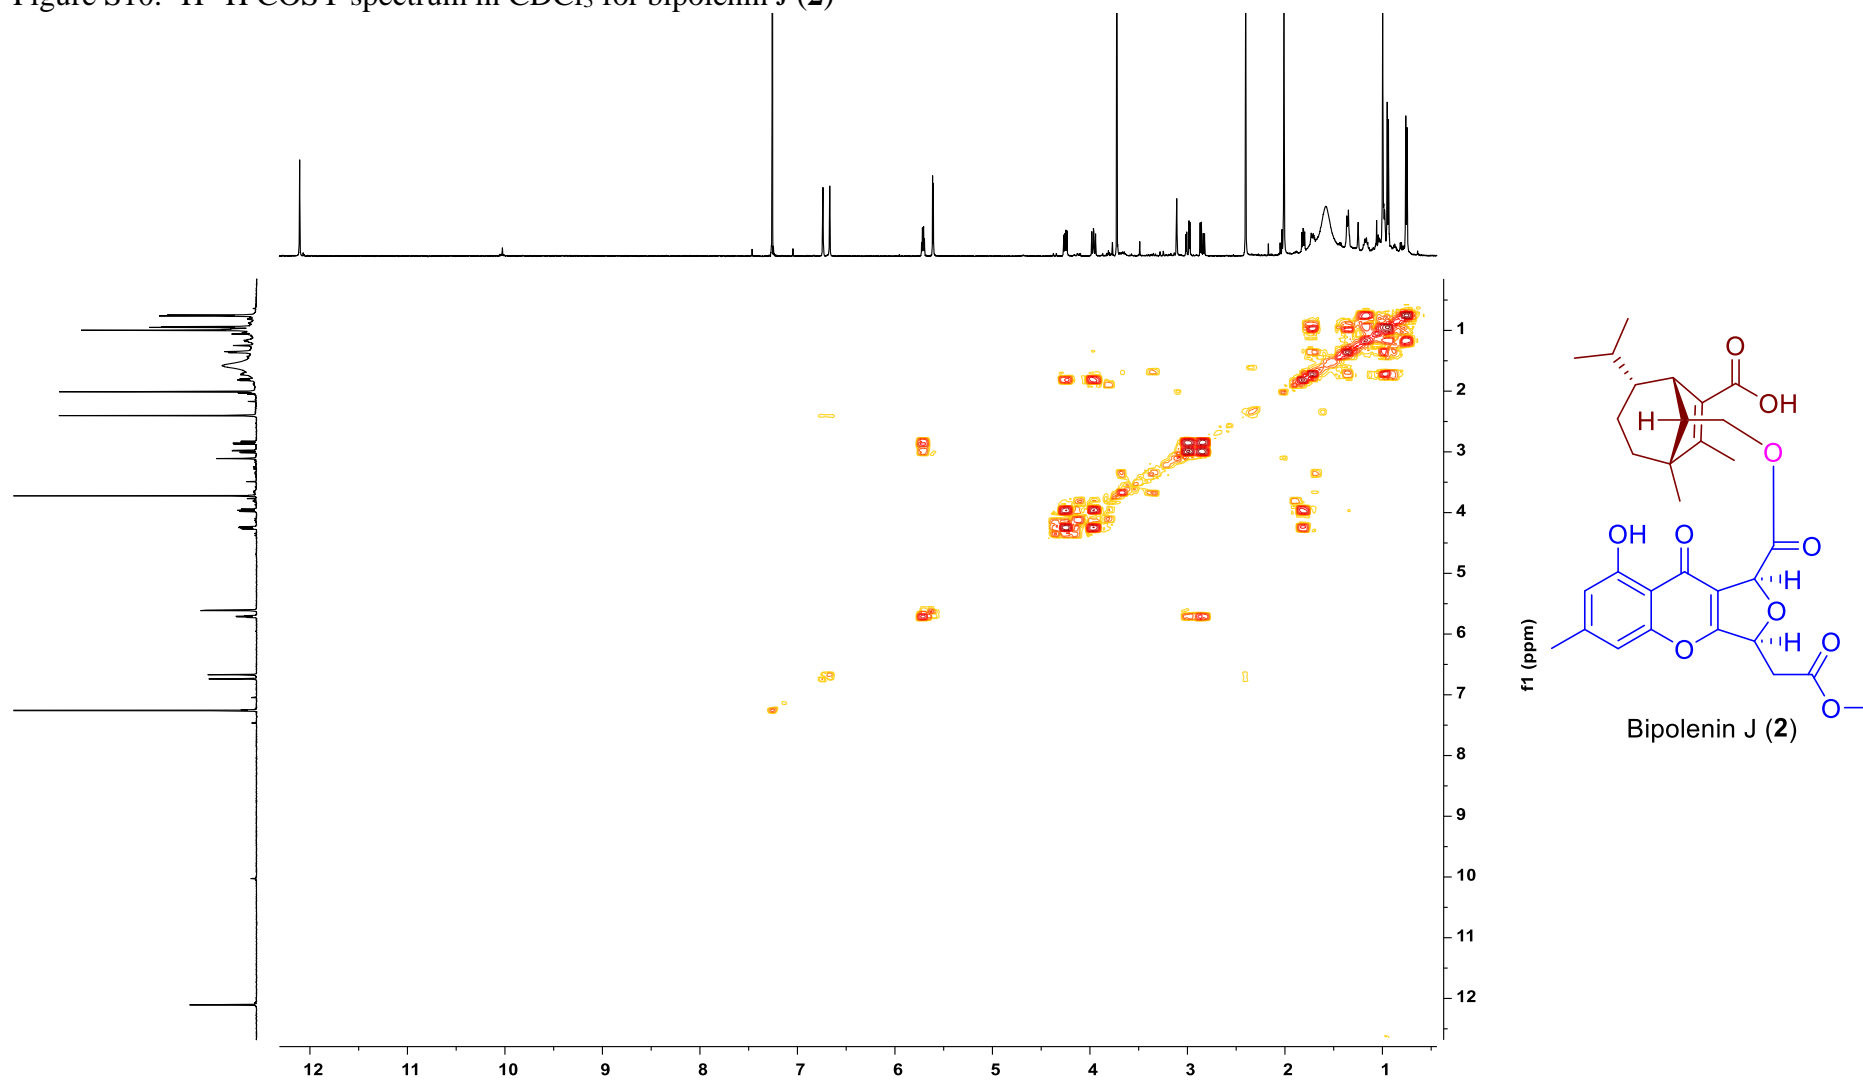

Figure S11. HSQC spectrum in CDCl<sub>3</sub> for bipolenin J (**2**)

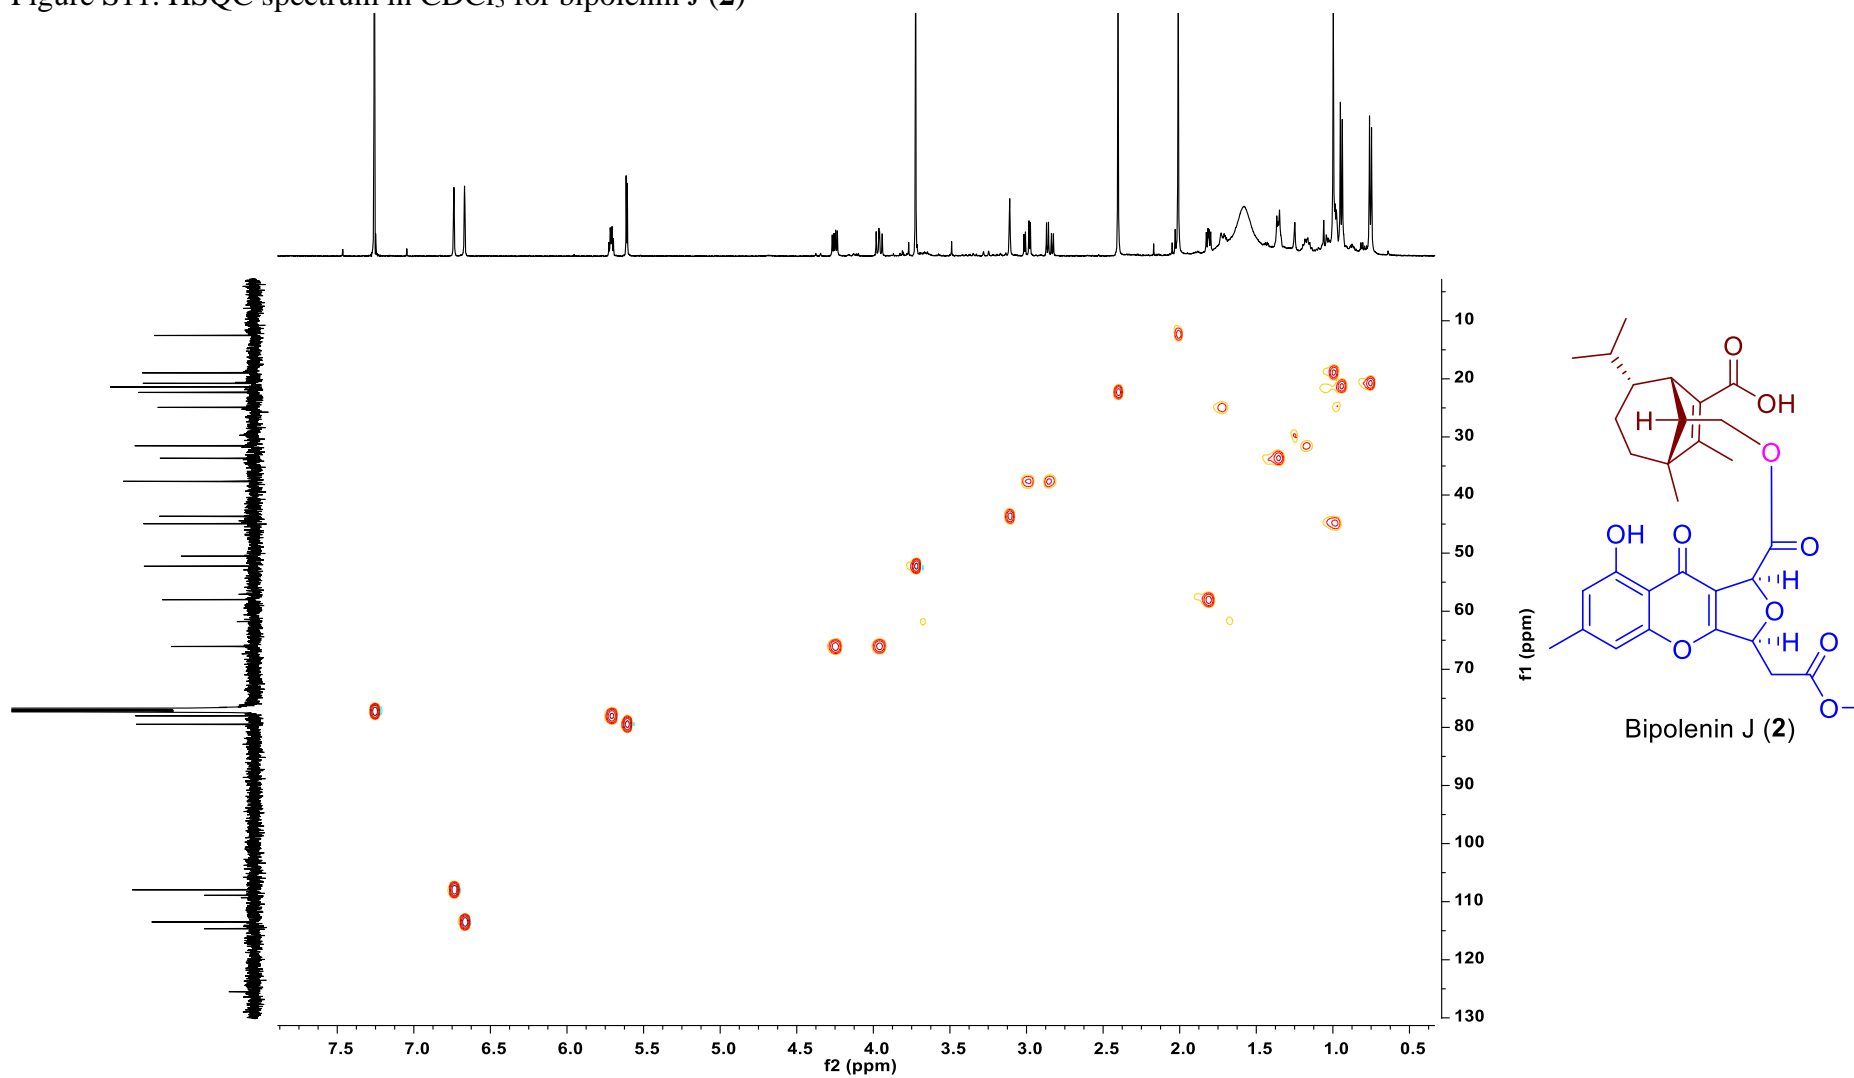

Figure S12. HMBC spectrum in CDCl<sub>3</sub> for bipolenin J (2)

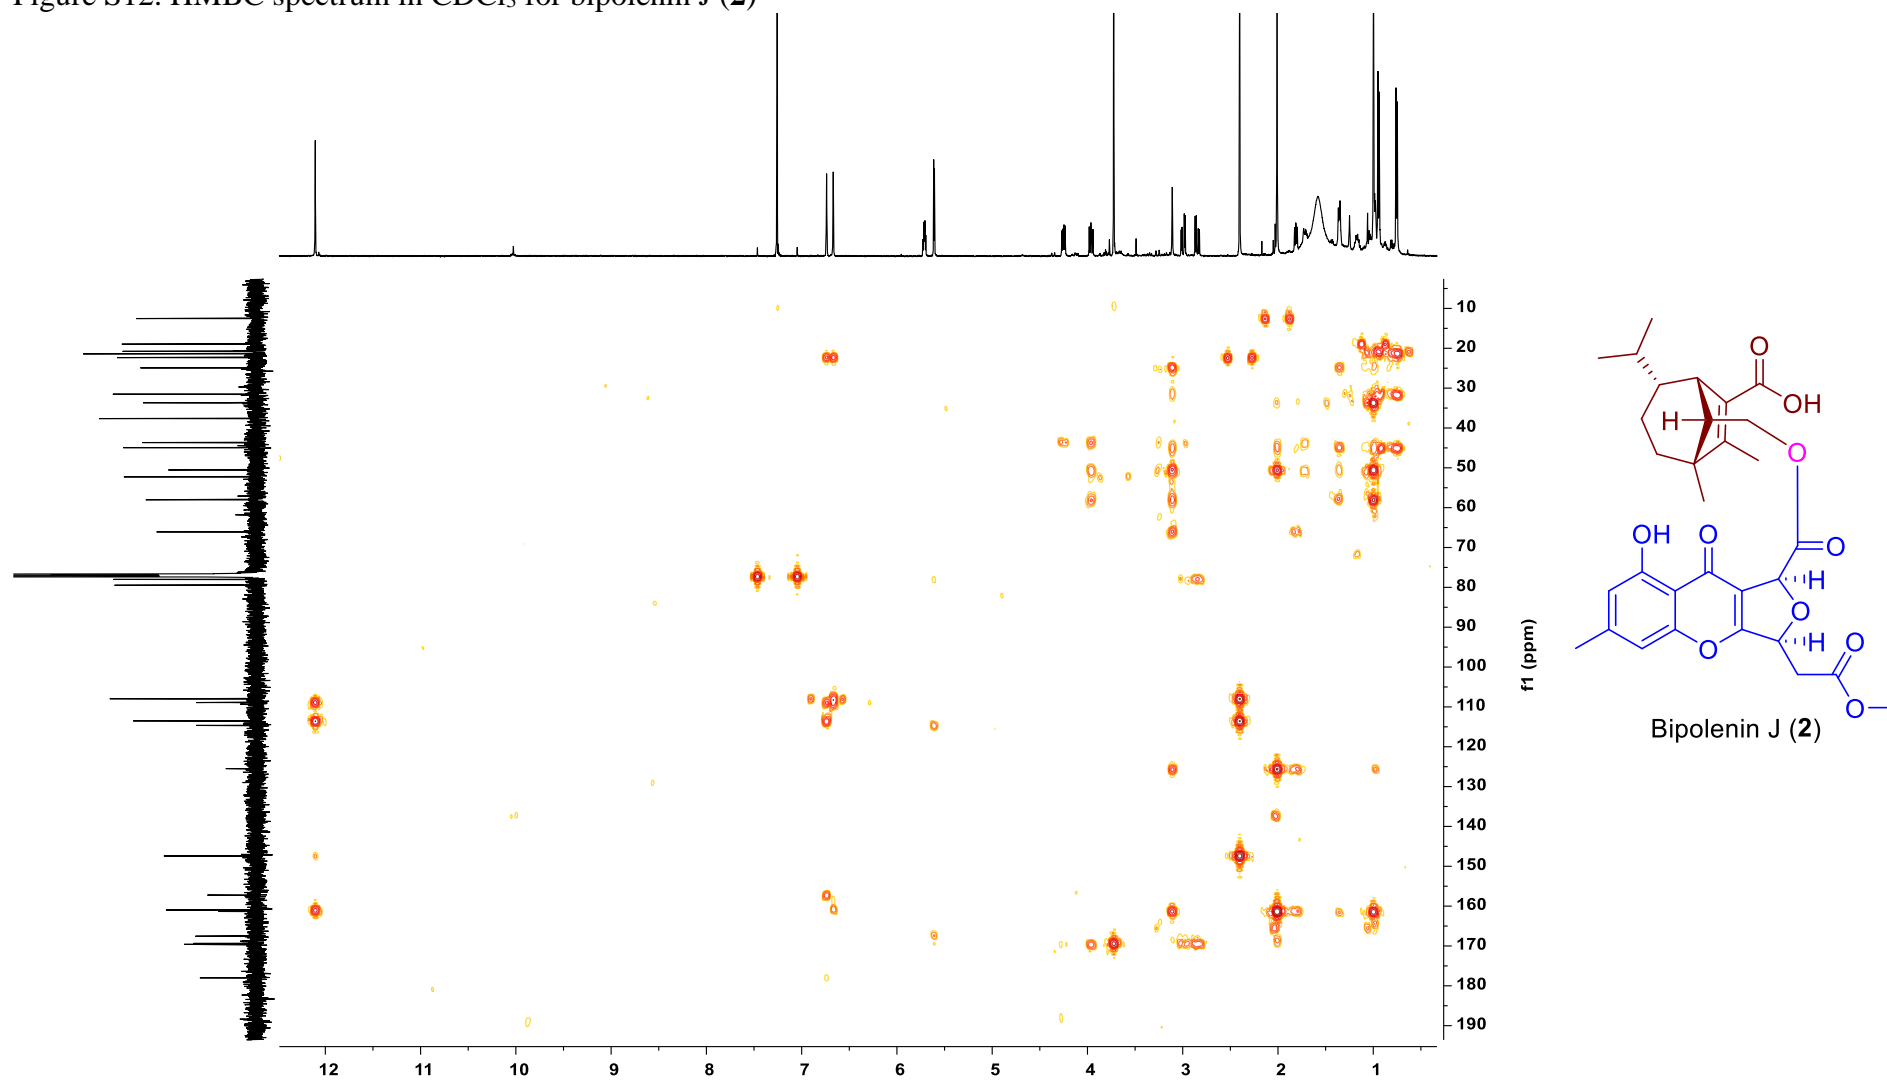

Figure S13. ROESY spectrum in CDCl<sub>3</sub> for bipolenin J (2)

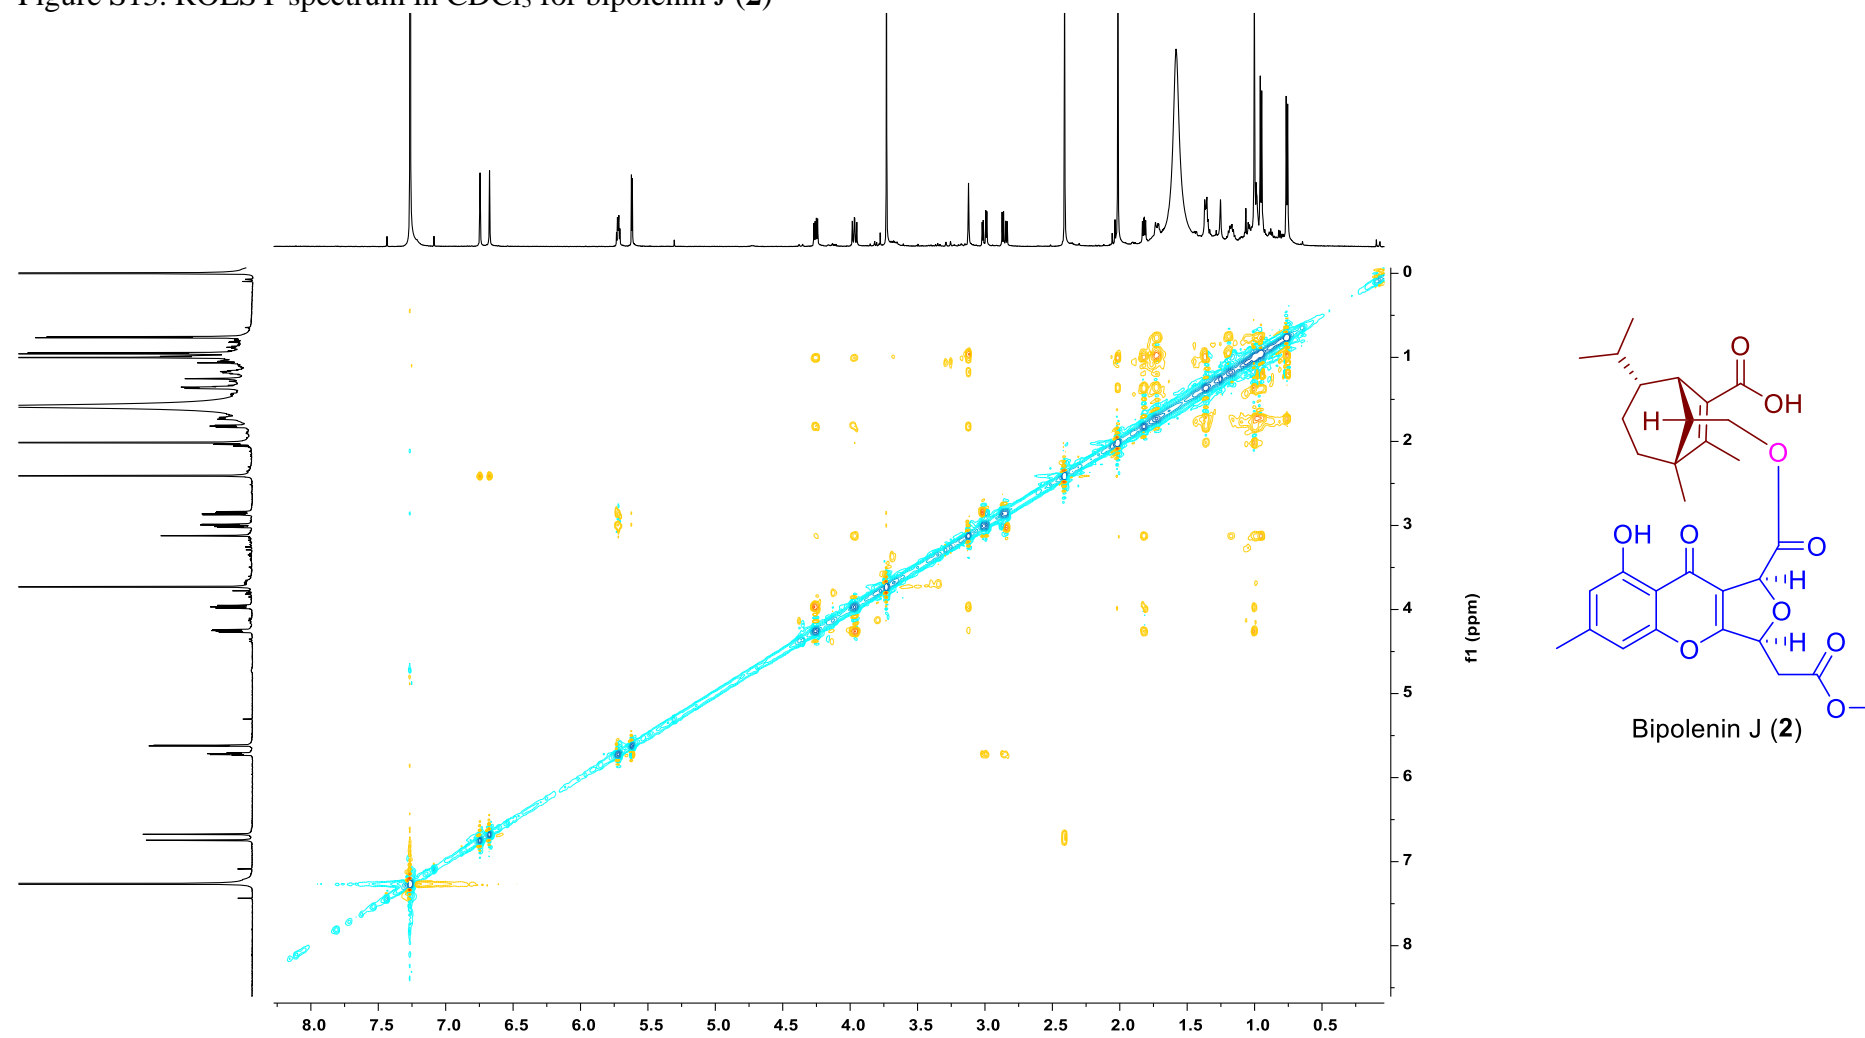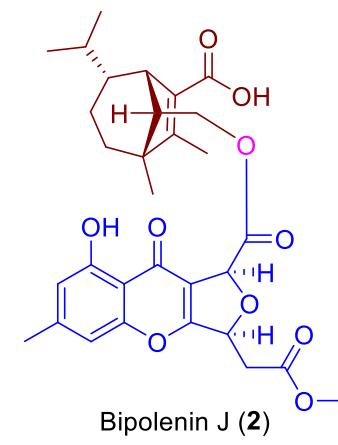

Figure S14. HRESIMS spectrum for bipolenin J (2)

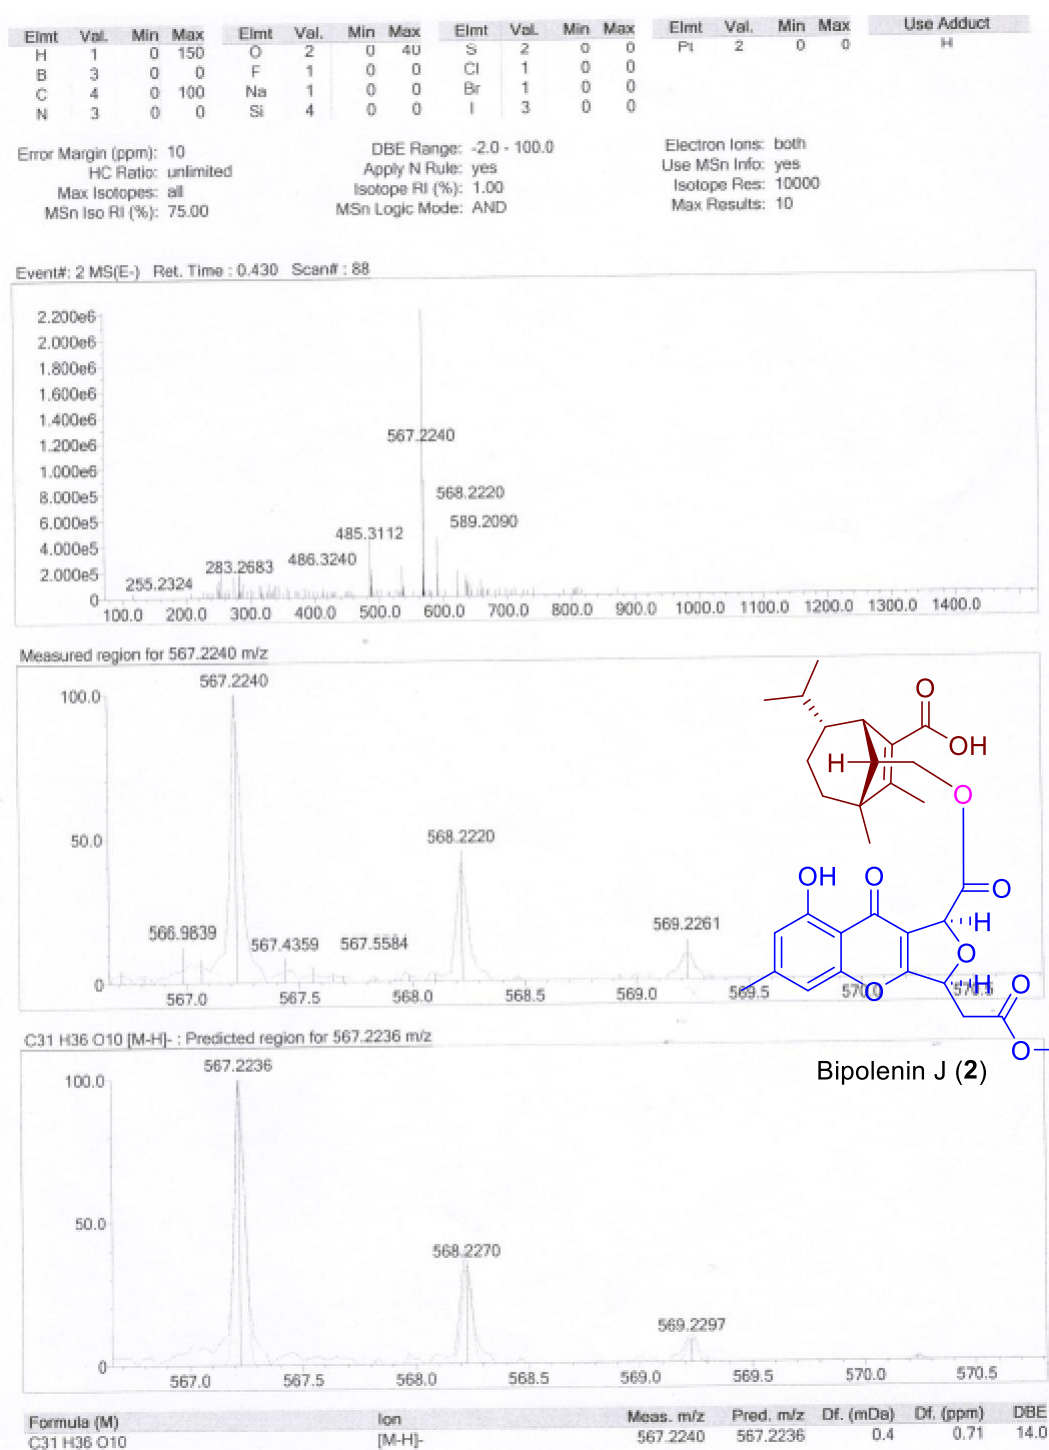

Supplement: c8ra09861a1.pdf [file c8ra09861a1.pdf]
